# Supplementary material
Source: publisher figshare collection journal article supplement (https://karger.figshare.com/ndownloader/files/30702173)
Supplement: Supplementary file 1 [file 30702173]

|  | T0* | T3 | T6 | T9 | Last FU* | *p value** |
| --- | --- | --- | --- | --- | --- | --- |
| OC | | 41.5 | | --- | | (± 22.9) | | | 13.5 | | --- | | (± 7.0) | | | 9.9 | | --- | | (± 2.5) | | | 6.8 | | --- | | (± 2.7) | | | 6.7 | | --- | | (± 2.3) | | *p=0.0001* |
| BAP | | 19.5 | | --- | | (± 4.9) | | | 9.4 | | --- | | (± 0.75) | | | 8.9 | | --- | | (± 0.48) | | | 7.7 | | --- | | (± 0.99) | | | 8.2 | | --- | | (± 0.68) | | *p=0.0001* |
| β-CTX | | 0.498 | | --- | | (± 0.107) | | | 0.034 | | --- | | (± 0.001) | | | 0.033 | | --- | | (± 0.001) | | | 0.033 | | --- | | (± 0.001) | | | 0.084 | | --- | | (± 0.055) | | *p=0.0001* |

Supplemental Table 2. Bone turnovers markers trend (evaluated every three months) during denosumab treatment (a single 60 mg dose every six month). The p Value is referred to the difference between last follow-up value and basal value (T0). The values are represented by mean value and standard deviation.
